# Supplementary material
Source: PubMed Central journal article supplement (PMC8627525)

# ALT elevation group

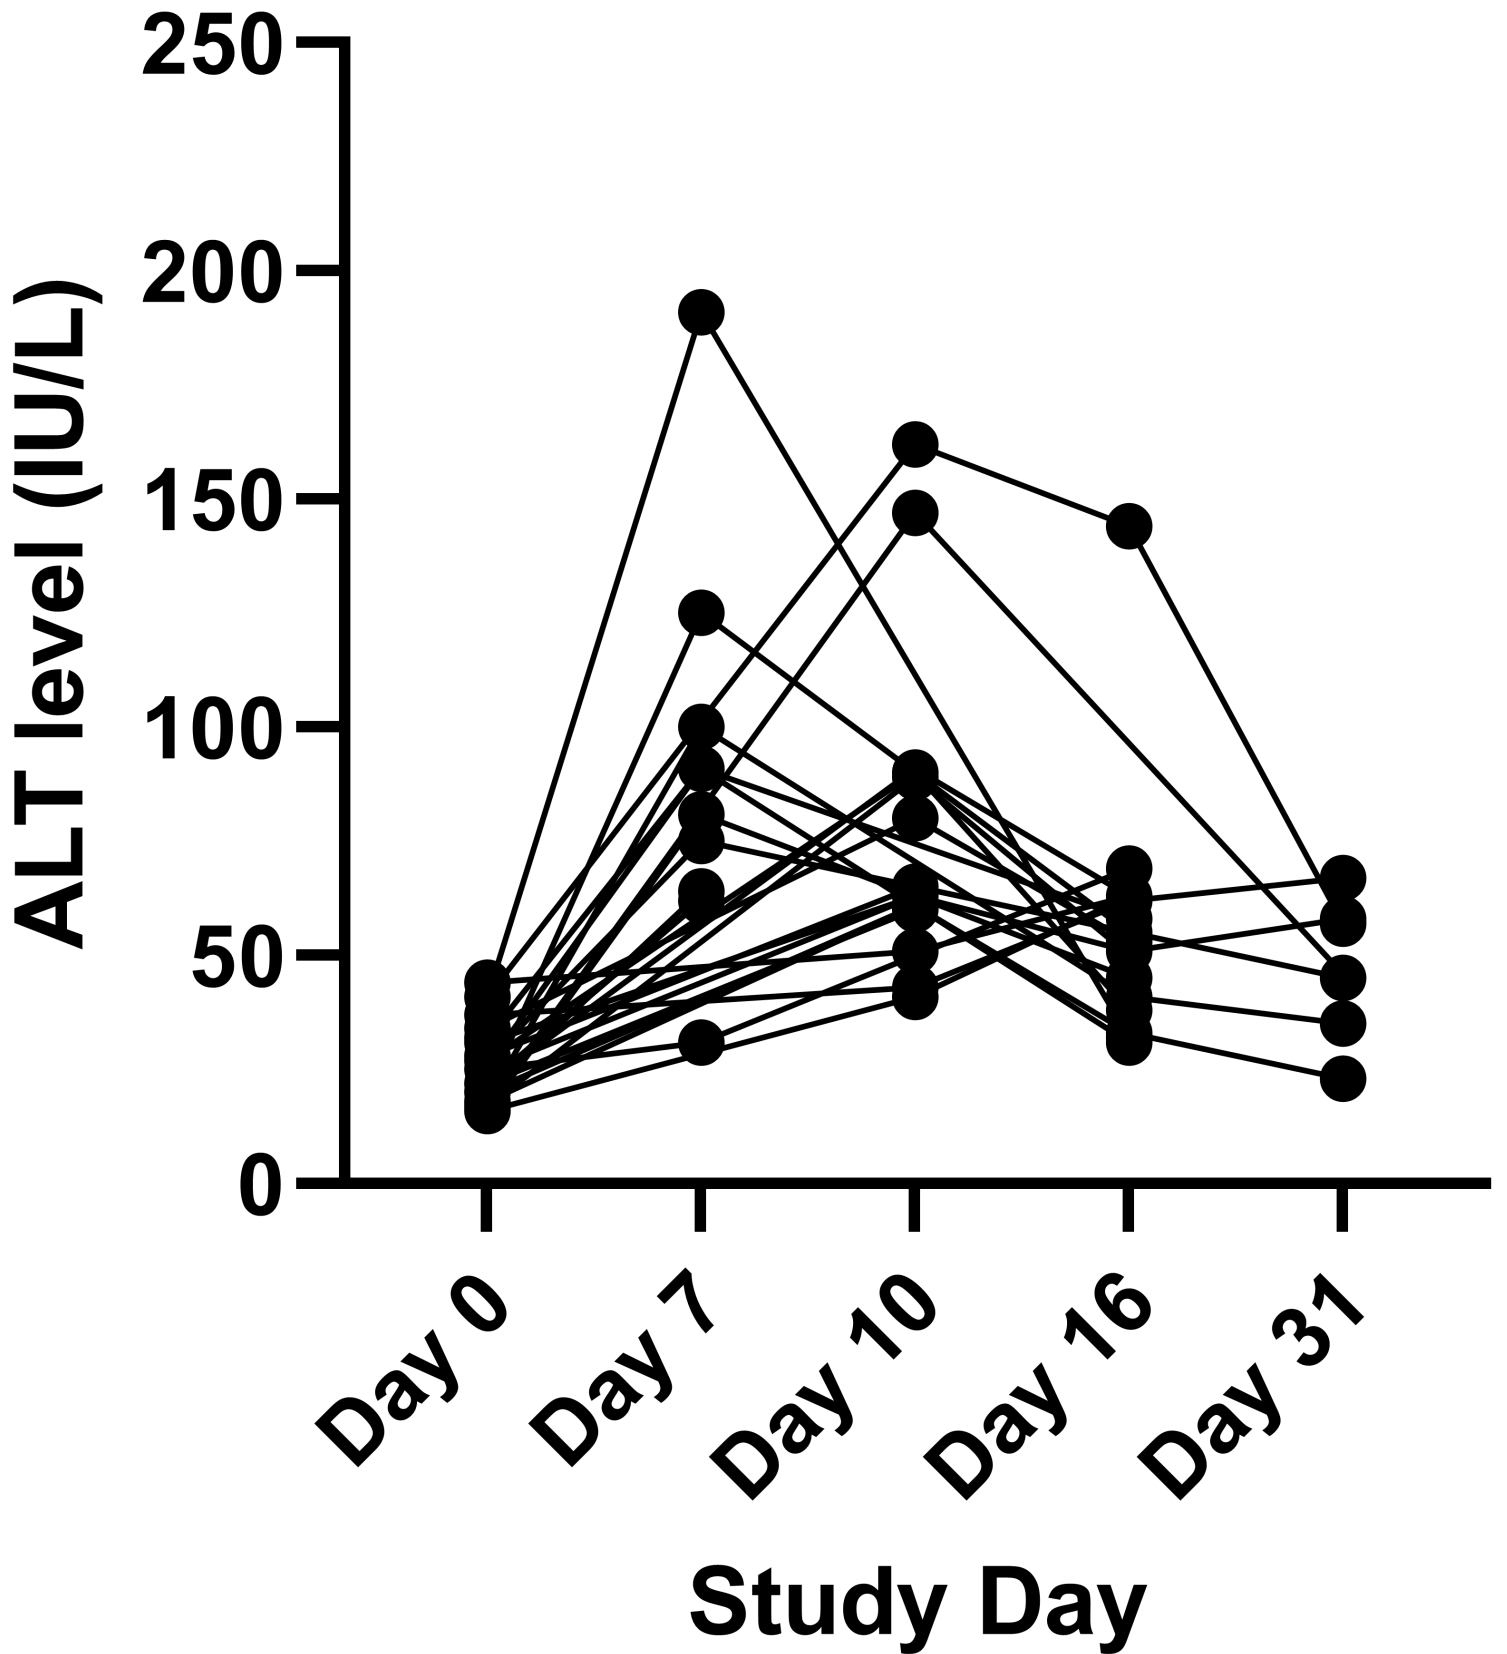

Supplement: NIHMS1719994-supplement-Supplemental_Figure_1__ALT_Group.pdf [file NIHMS1719994-supplement-Supplemental_Figure_1__ALT_Group.pdf]
